# Supplementary material for: Synergistic Anti-Angiogenic Effect of Combined VEGFR Kinase Inhibitors, Lenvatinib, and Regorafenib: A Therapeutic Potential for Breast Cancer
Source: MDPI journal article supplement (doi:10.3390/ijms23084408), 2022-04-16
Supplement: s1 [file s1]

## Supplementary figures

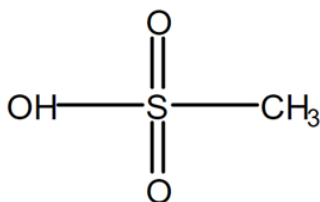

CAS Name : Lenvatinib mesylate,

Molecular Formula : C<sub>21</sub>H<sub>19</sub>ClN<sub>4</sub>O<sub>4</sub>.CH<sub>4</sub>O<sub>3</sub>S

CAS Registry Number® 857890-39-2

Reference :

Lenvatinib mesylate. *CAS Common Chemistry*. CAS, a division of the American Chemical Society,

n.d. [https://commonchemistry.cas.org/detail?ref=857890-39-](https://commonchemistry.cas.org/detail?ref=857890-39-2)

2 (retrieved 2021-05-05) (CAS RN: 857890-39-2). Licensed under

the Attribution-Noncommercial 4.0 International License (CC BY-

NC 4.0).

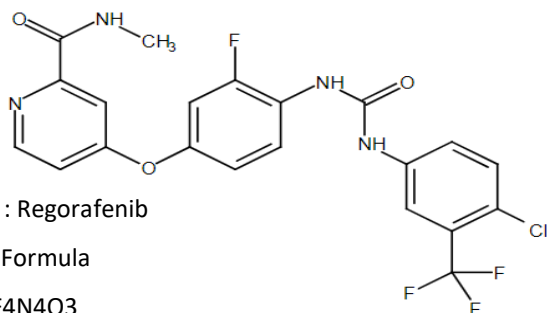

CAS Name : Regorafenib

Molecular Formula

C<sub>21</sub>H<sub>15</sub>ClF<sub>4</sub>N<sub>4</sub>O<sub>3</sub>

CAS Registry Number®

755037-03-7

Reference :

Regorafenib. *CAS Common Chemistry*. CAS, a division of the American Chemical Society, n.d.

[https://commonchemistry.cas.org/detail?cas\\_rn=755037-03-7](https://commonchemistry.cas.org/detail?cas_rn=755037-03-7) (retrieved 2021-05-05) (CAS RN:

755037-03-7).

**Supplementary Figure S1:** Chemical structure of Lenvatinib and Regorafenib

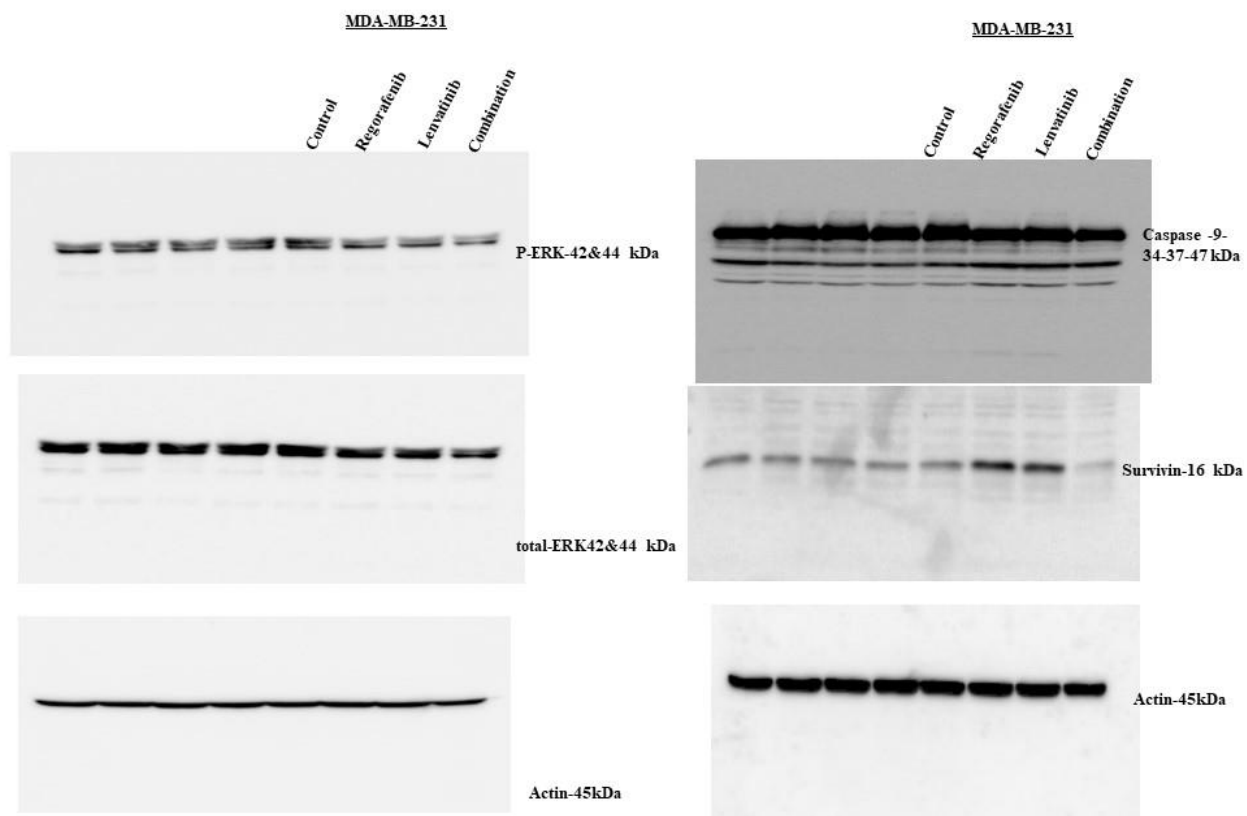

**Supplementary Figure S2:** Original western blot for caspase, surviving, P-ERK and total-ERK.

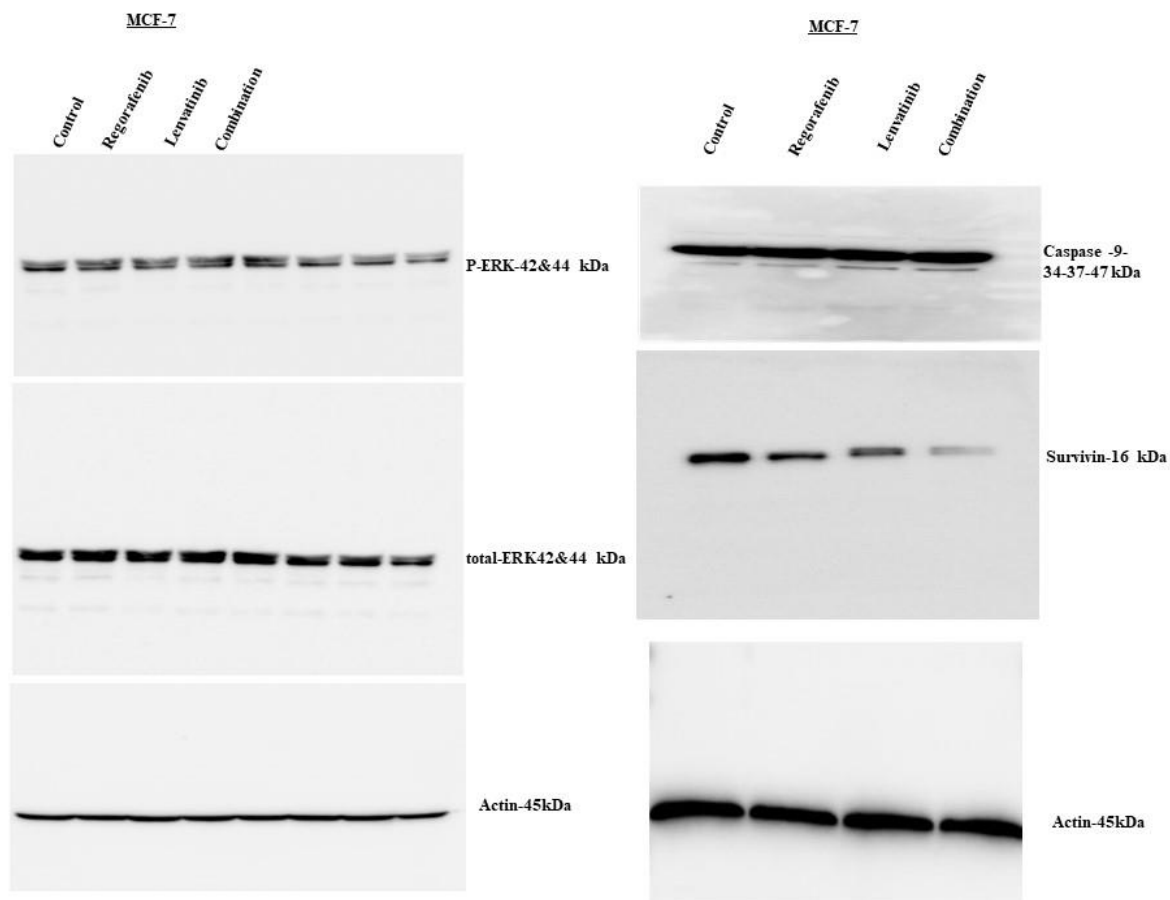

**Supplementary Figure S3:** Original western blot for caspase, surviving, P-ERK and total-ERK.

# Supplementary CompuSyn Report 1-MCF7 cells

**Experiment Name:** REG-LEN  
**Date:** 9.5.2021  
**File Name:** C:\Users\USER\Downloads\com72\_MCF7 EXP.cse  
**Description**  
**Drug:** REG (REG) [uM]  
**Drug:** LEN (LEN) [uM]  
**Drug Combo:** Com 72 (Com72) (REG+LEN)

---

Data for Drug: REG [uM]

| Dose | Effect |
|------|--------|
|------|--------|

|     |      |
|-----|------|
| 1.0 | 0.99 |
|-----|------|

|     |     |
|-----|-----|
| 5.0 | 0.9 |
|-----|-----|

|      |      |
|------|------|
| 10.0 | 0.87 |
|------|------|

3 data points entered.

**X-int:** 1.59249

**Y-int:** 1.95302 +/- 0.17272

**m:** -1.2264 +/- 0.24520

**Dm:** 39.1282

**r:** -0.9806

---

Data for Drug: LEN [uM]

| Dose | Effect |
|------|--------|
|------|--------|

|      |      |
|------|------|
| 10.0 | 0.99 |
|------|------|

|      |      |
|------|------|
| 50.0 | 0.64 |
|------|------|

|       |      |
|-------|------|
| 100.0 | 0.64 |
|-------|------|

3 data points entered.

**X-int:** 2.00920

**Y-int:** 3.77364 +/- 0.93455

**m:** -1.8782 +/- 0.57640

**Dm:** 102.140

**r:** -0.9560

---

Data for Non-Constant Combo: Com72 (REG+LEN)

| Dose REG | Dose LEN | Effect |
|----------|----------|--------|
|----------|----------|--------|

|     |      |      |
|-----|------|------|
| 5.0 | 10.0 | 0.87 |
|-----|------|------|

|     |      |      |
|-----|------|------|
| 5.0 | 50.0 | 0.62 |
|-----|------|------|

|     |       |      |
|-----|-------|------|
| 5.0 | 100.0 | 0.47 |
|-----|-------|------|

**Dose REG Dose LEN Effect**

10.0      10.0      0.53

10.0      50.0      0.48

10.0      100.0      0.4

6 data points entered.

Dose-Effect Curve

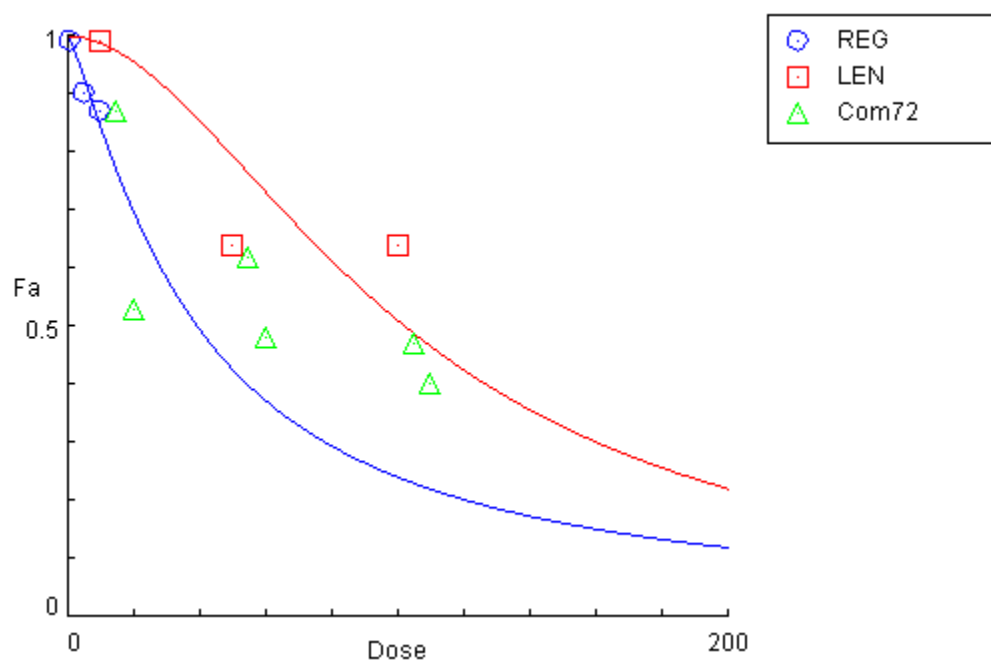

Median-Effect Plot

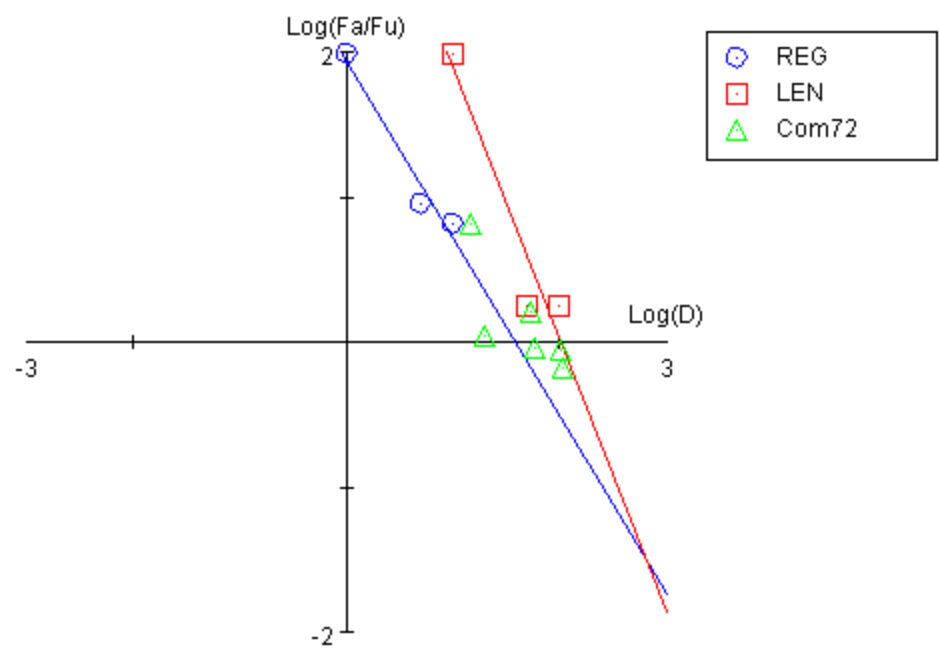

CI Data for Non-Constant Combo: Com72 (REG+LEN)

| Dose REG | Dose LEN | Effect | CI      |
|----------|----------|--------|---------|
| 5.0      | 10.0     | 0.87   | 0.87146 |
| 5.0      | 50.0     | 0.62   | 0.82577 |
| 5.0      | 100.0    | 0.47   | 1.03424 |
| 10.0     | 10.0     | 0.53   | 0.38625 |
| 10.0     | 50.0     | 0.48   | 0.70852 |
| 10.0     | 100.0    | 0.4    | 0.97257 |

Combination Index Plot

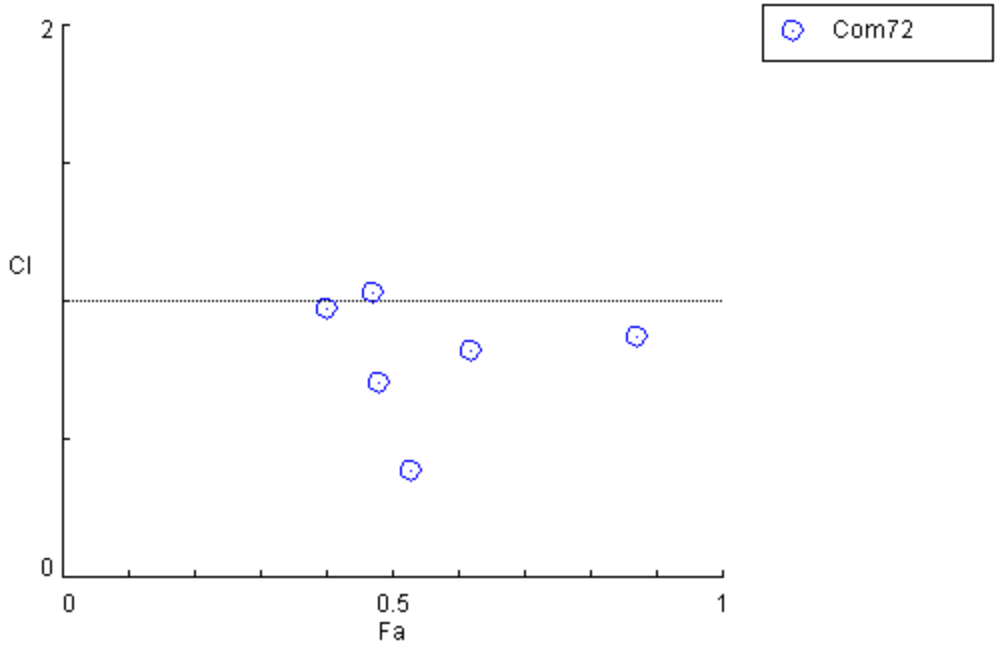

DRI Data for Non-Constant Combo: Com72 (REG+LEN)

| Fa   | Dose REG | Dose LEN | DRI REG | DRI LEN |
|------|----------|----------|---------|---------|
| 0.87 | 8.30456  | 37.1224  | 1.66091 | 3.71224 |
| 0.62 | 26.2500  | 78.7041  | 5.25001 | 1.57408 |
| 0.47 | 43.1555  | 108.887  | 8.63110 | 1.08887 |
| 0.53 | 35.4768  | 95.8108  | 3.54768 | 9.58108 |
| 0.48 | 41.7672  | 106.587  | 4.17672 | 2.13174 |
| 0.4  | 54.4596  | 126.751  | 5.44596 | 1.26751 |

DRI Plot for Non-Constant Combo: Com72 (REG+LEN)

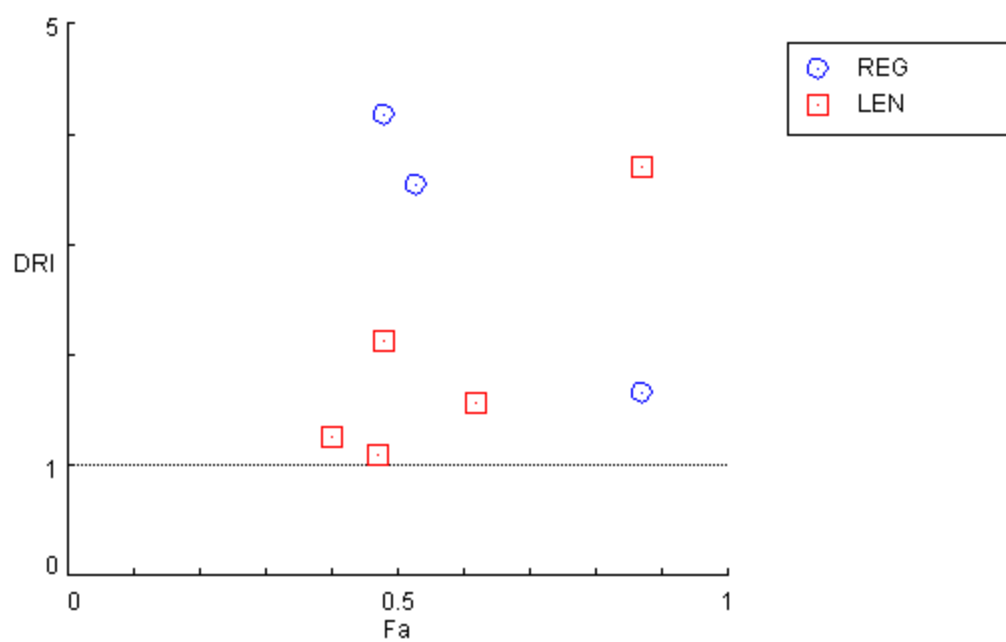

Normalized Isobologram for Combo: Com72 (REG+LEN)

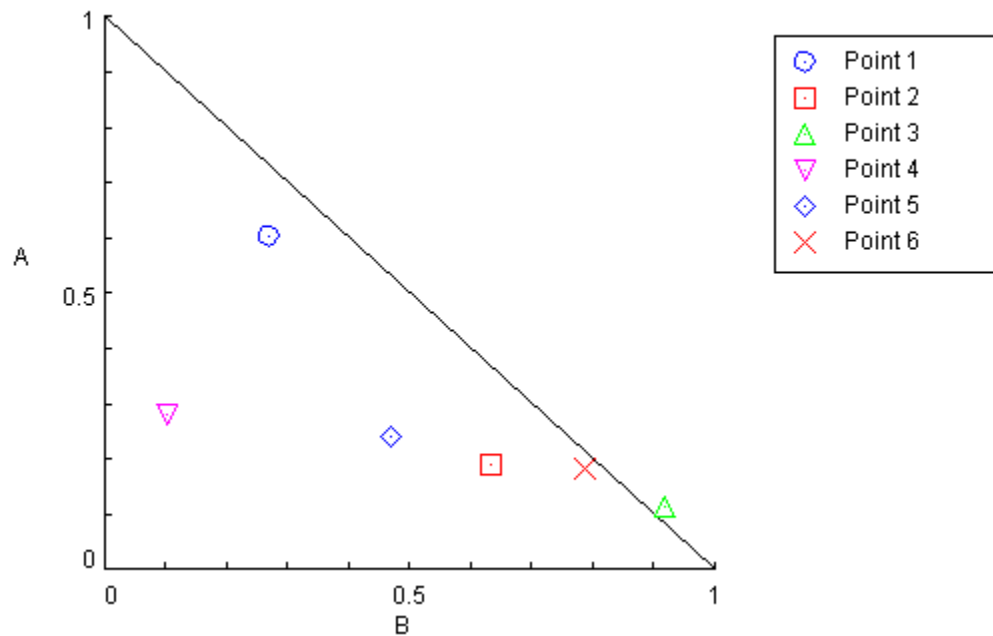

## Summary Table

**Experiment Name:** REG-LEN  
**Date:** 9.5.2021



**File Name:** C:\Users\USER\Downloads\com72\_MCF7 EXP.cse

**Description**

**Drug:** REG (REG) [uM]

**Drug:** LEN (LEN) [uM]

**Drug Combo:** Com 72 (Com72) (REG+LEN)

---

| <b>Drug/Combo</b> | <b>Dm</b> | <b>m</b> | <b>r</b> |
|-------------------|-----------|----------|----------|
| REG               | 39.1282   | -1.2264  | -0.9806  |
| LEN               | 102.140   | -1.8782  | -0.9560  |

---

CI values at:

**Combo ED50 ED75 ED90 ED95**

---

Data for Fa = 0.5

| <b>Drug/Combo</b> | <b>CI value</b> | <b>Dose REG</b> | <b>Dose LEN</b> |
|-------------------|-----------------|-----------------|-----------------|
| REG               | 39.1282         |                 |                 |
| LEN               |                 | 102.140         |                 |

---

Data for Fa = 0.75

| <b>Drug/Combo</b> | <b>CI value</b> | <b>Dose REG</b> | <b>Dose LEN</b> |
|-------------------|-----------------|-----------------|-----------------|
| REG               | 15.9752         |                 |                 |
| LEN               |                 | 56.9066         |                 |

---

Data for Fa = 0.9

| <b>Drug/Combo</b> | <b>CI value</b> | <b>Dose REG</b> | <b>Dose LEN</b> |
|-------------------|-----------------|-----------------|-----------------|
| REG               | 6.52232         |                 |                 |
| LEN               |                 | 31.7051         |                 |

---

Data for Fa = 0.95

| <b>Drug/Combo</b> | <b>CI value</b> | <b>Dose REG</b> | <b>Dose LEN</b> |
|-------------------|-----------------|-----------------|-----------------|
| REG               | 3.54647         |                 |                 |
| LEN               |                 | 21.2986         |                 |

---

Data for Fa = 0.97

| <b>Drug/Combo</b> | <b>CI value</b> | <b>Dose REG</b> | <b>Dose LEN</b> |
|-------------------|-----------------|-----------------|-----------------|
| REG               | 2.29891         |                 |                 |
| LEN               |                 | 16.0478         |                 |

# Supplementary CompuSyn Report 2- MD-NB 231 cells

**Experiment Name:** REG\_LEN\_72\_TN  
**Date:** 9.5.2021  
**File Name:** C:\Users\USER\Downloads\com72\_TN.cse  
**Description**

**Drug:** REG (REG) [uM]  
**Drug:** LEN (LEN) [uM]  
**Drug Combo:** Com72\_TN (TN72) (REG+LEN)

---

Data for Drug: REG [uM]

| Dose | Effect |
|------|--------|
|------|--------|

|     |      |
|-----|------|
| 1.0 | 0.99 |
|-----|------|

|     |      |
|-----|------|
| 5.0 | 0.96 |
|-----|------|

|      |      |
|------|------|
| 10.0 | 0.91 |
|------|------|

3 data points entered.

**X-int:** 2.06953

**Y-int:** 2.01034 +/- 0.05960

**m:** -0.9714 +/- 0.08461

**Dm:** 117.364

**r:** -0.9962

---

Data for Drug: LEN [uM]

| Dose | Effect |
|------|--------|
|------|--------|

|      |      |
|------|------|
| 10.0 | 0.99 |
|------|------|

|      |      |
|------|------|
| 50.0 | 0.86 |
|------|------|

|       |      |
|-------|------|
| 100.0 | 0.92 |
|-------|------|

3 data points entered.

**X-int:** 2.75905

**Y-int:** 2.96456 +/- 0.98479

**m:** -1.0745 +/- 0.60738

**Dm:** 574.186

**r:** -0.8705

---

Data for Non-Constant Combo: TN72 (REG+LEN)

| Dose REG | Dose LEN | Effect |
|----------|----------|--------|
|----------|----------|--------|

|     |      |      |
|-----|------|------|
| 5.0 | 10.0 | 0.99 |
|-----|------|------|

|     |      |      |
|-----|------|------|
| 5.0 | 50.0 | 0.97 |
|-----|------|------|

**Dose REG Dose LEN Effect**

5.0        100.0     0.74

10.0      100.0     0.7

4 data points entered.

Dose-Effect Curve

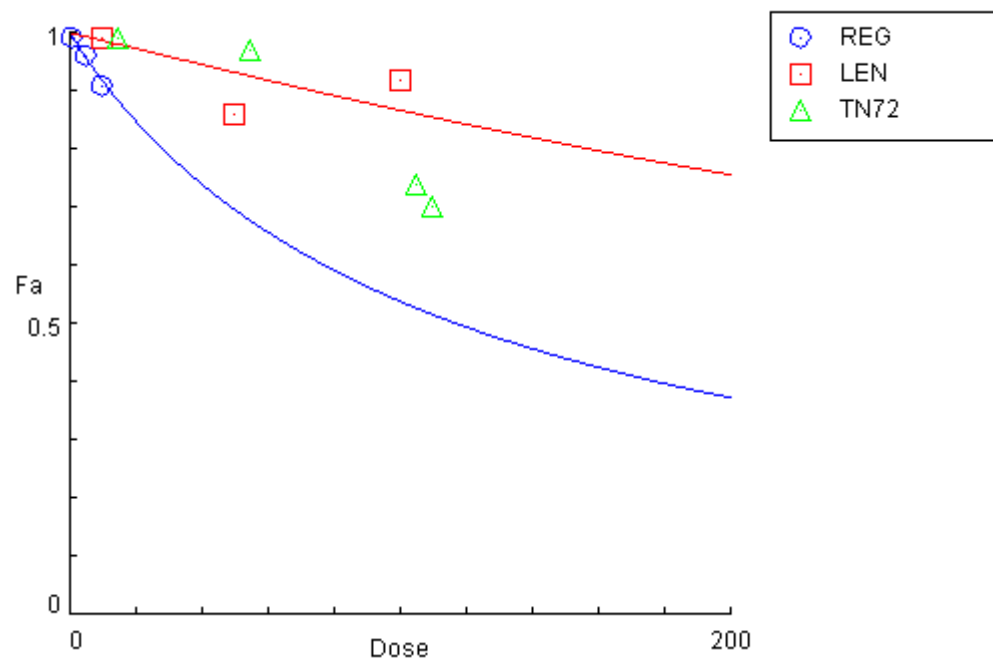

Median-Effect Plot

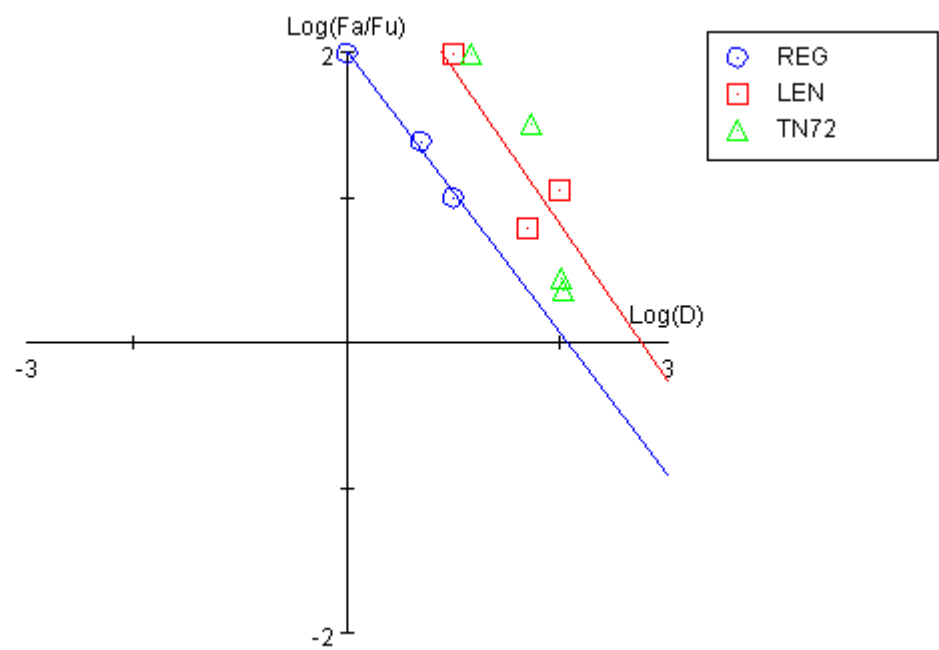

CI Data for Non-Constant Combo: TN72 (REG+LEN)

| Dose REG | Dose LEN | Effect | CI      |
|----------|----------|--------|---------|
| 5.0      | 10.0     | 0.99   | 6.08257 |
| 5.0      | 50.0     | 0.97   | 3.73862 |
| 5.0      | 100.0    | 0.74   | 0.58606 |
| 10.0     | 100.0    | 0.7    | 0.58703 |

Combination Index Plot

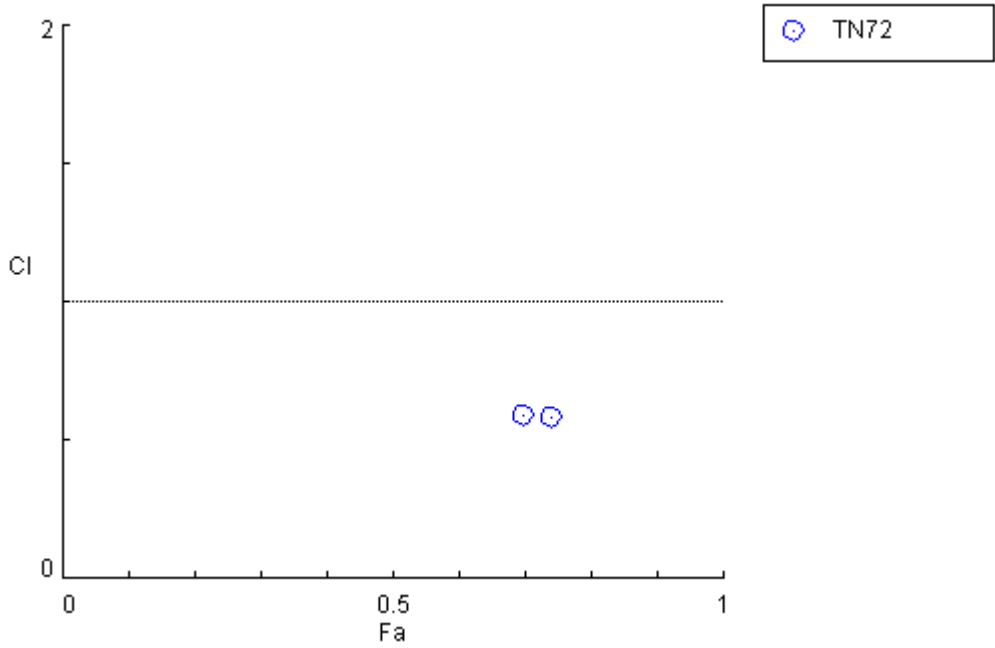

| DRI Data for Non-Constant Combo: TN72 (REG+LEN) |          |          |         |         |
|-------------------------------------------------|----------|----------|---------|---------|
| Fa                                              | Dose REG | Dose LEN | DRI REG | DRI LEN |
| 0.99                                            | 1.03547  | 7.97545  | 0.20709 | 0.79754 |
| 0.97                                            | 3.27667  | 22.5970  | 0.65533 | 0.45194 |
| 0.74                                            | 39.9853  | 216.912  | 7.99706 | 2.16912 |
| 0.7                                             | 49.0594  | 260.966  | 4.90594 | 2.60966 |

DRI Plot for Non-Constant Combo: TN72 (REG+LEN)

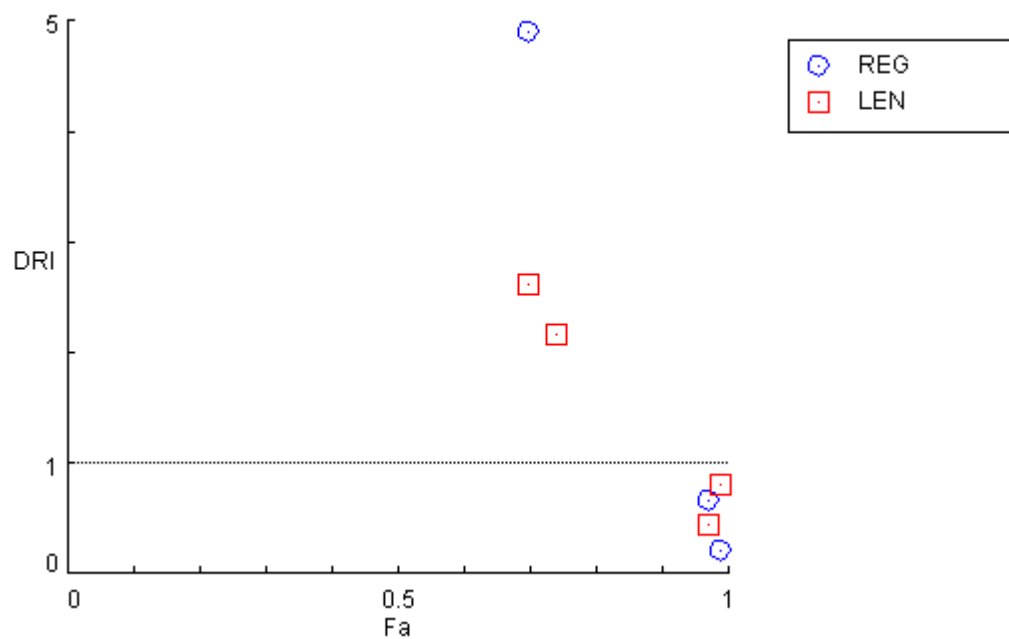

Normalized Isobologram for Combo: TN72 (REG+LEN)

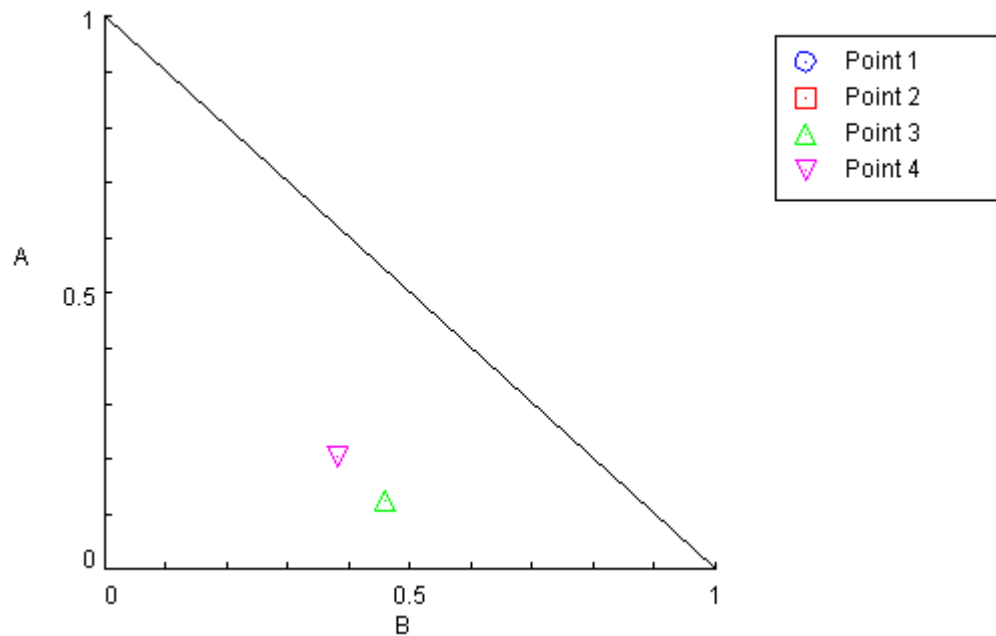

## Summary Table

**Experiment Name:** REG\_LEN\_72\_TN  
**Date:** 9.5.2021

**File Name:** C:\Users\USER\Downloads\com72\_TN.cse

**Description**

**Drug:** REG (REG) [uM]

**Drug:** LEN (LEN) [uM]

**Drug Combo:** Com72\_TN (TN72) (REG+LEN)

---

| <b>Drug/Combo</b> | <b>Dm</b> | <b>m</b> | <b>r</b> |
|-------------------|-----------|----------|----------|
| REG               | 117.364   | -0.9714  | -0.9962  |
| LEN               | 574.186   | -1.0745  | -0.8705  |

---

CI values at:

**Combo ED50 ED75 ED90 ED95**

---

Data for Fa = 0.5

**Drug/Combo CI value Dose REG Dose LEN**

REG 117.364

LEN 574.186

---

Data for Fa = 0.75

**Drug/Combo CI value Dose REG Dose LEN**

REG 37.8760

LEN 206.541

---

Data for Fa = 0.9

**Drug/Combo CI value Dose REG Dose LEN**

REG 12.2235

LEN 74.2948

---

Data for Fa = 0.95

**Drug/Combo CI value Dose REG Dose LEN**

REG 5.66406

LEN 37.0632

---

Data for Fa = 0.97

**Drug/Combo CI value Dose REG Dose LEN**

REG 3.27667

LEN 22.5970
